# Supplementary material for: Do Women Have a Higher Mortality Risk Than Men following ICU Admission after Out-of-Hospital Cardiac Arrest? A Retrospective Cohort Analysis
Source: MDPI journal article supplement (doi:10.3390/jcm10184286), 2021-09-21
Supplement: s1 [file s1]

**Table S1.** Presenting the regression analyses only including ICU survivors

|                                |                              | Favourable CPC score<br>(model 1) | ICU length of stay<br>(model 2) |
|--------------------------------|------------------------------|-----------------------------------|---------------------------------|
| Men                            |                              | 1.341 (0.654 – 2.746)             | 0.685 (-0.505 - 1.875)          |
| Age                            |                              | <b>0.975 (0.952 – 0.997)</b>      | -0.002 (-0.038 - 0.035)         |
| Medical history                | Hypercholesterolemia         | 1.272 (0.634 – 2.553)             | -0.137 (-1.355 - 1.081)         |
|                                | Former myocardial infarction | 1.377 (0.596 – 3.179)             | 0.0553 (-0.963 - 2.069)         |
|                                | Chronic lung disease         | 0.471 (0.152 – 1.463)             | -0.137 (-1.774 - 1.499)         |
|                                | Pulmonary embolism           | 2.667 (0.472 – 15.072)            | -1.481 (-5.781 - 2.820)         |
|                                | Former PCI                   | 0.460 (0.162 – 1.305)             | 2.32 (-1.880 - 1.415)           |
|                                | Former CABG                  | 0.274 (0.059 – 1.278)             | -0.396 (-2.463 - 1.670)         |
| Medication use history         | Aspirin                      | 1.446 (0.634 – 3.300)             | -0.707 (-2.214 -0.801)          |
|                                | Calcium-channel blocker      | 1.125 (0.431 – 2.933)             | 0.862 (-0.958 - 2.682)          |
|                                | Statins                      | 0.753 (0.336 – 1.689)             | -0.503 (-1.896 - 0.890)         |
| Cardiac arrest characteristics | Location of arrest           |                                   |                                 |
|                                | Home                         | <b>0.476 (0.264 – 0.860)</b>      | Reference                       |
|                                | Public                       | Reference                         | -0.662 (-1.644 - 0.320)         |
|                                | Defibrillation by AED        | 0.860 (0.450 – 1.644)             | 0.034 (-1.069 - 1.138)          |
|                                | Initial rhythm               |                                   |                                 |
|                                | Shock                        | Reference                         | -1.296 (-3.105 - 0.513)         |
|                                | Non-shock                    | <b>0.310 (0.130 – 0.740)</b>      | Reference                       |
|                                | Defibrillation by EMS        | 1.573 (0.717 – 3.452)             | 0.907 (-0.342 - 2.155)          |
|                                | Cause of arrest              |                                   |                                 |
|                                | Cardiac                      | 0.942 (0.185 – 4.809)             | Reference                       |
|                                | Non-cardiac                  | Reference                         | 1.834 (-0.987 - 4.655)          |
| N                              |                              | 613                               | 660                             |
| -2 Loglikelihood               |                              | 361,678                           |                                 |
| Likelihood ratio test p-value  |                              | 0.017                             |                                 |
| F-test (df; p-value)           |                              |                                   | 0.813 (16,643; 0.671)           |
| (Nagelkerke) R-square          |                              | 0.101                             | 0.02                            |

Note: Estimates are Odds Ratios (OR), and beta's, and 95% Confidence Interval in parentheses (95% CI), derived from a Binary logistic regression analysis (model 1) and a linear regression analysis (model 2). CPC: Cerebral Performance Score, ICU: Intensive Care Unit, PCI: Percutaneous Coronary Intervention, CABG: Coronary Artery Bypass Graft, AED: Automated External Defibrillator, EMS: Emergency Medical Service. Bold values are significant at 5% alpha level.
